# Supplementary material
Source: PubMed Central journal article supplement (PMC3637694)
Supplement: 1222314110_pnas.201222314SI.pdf [file 1222314110_pnas.201222314SI.pdf]

# Supporting Information

Depuydt et al. 10.1073/pnas.1222314110

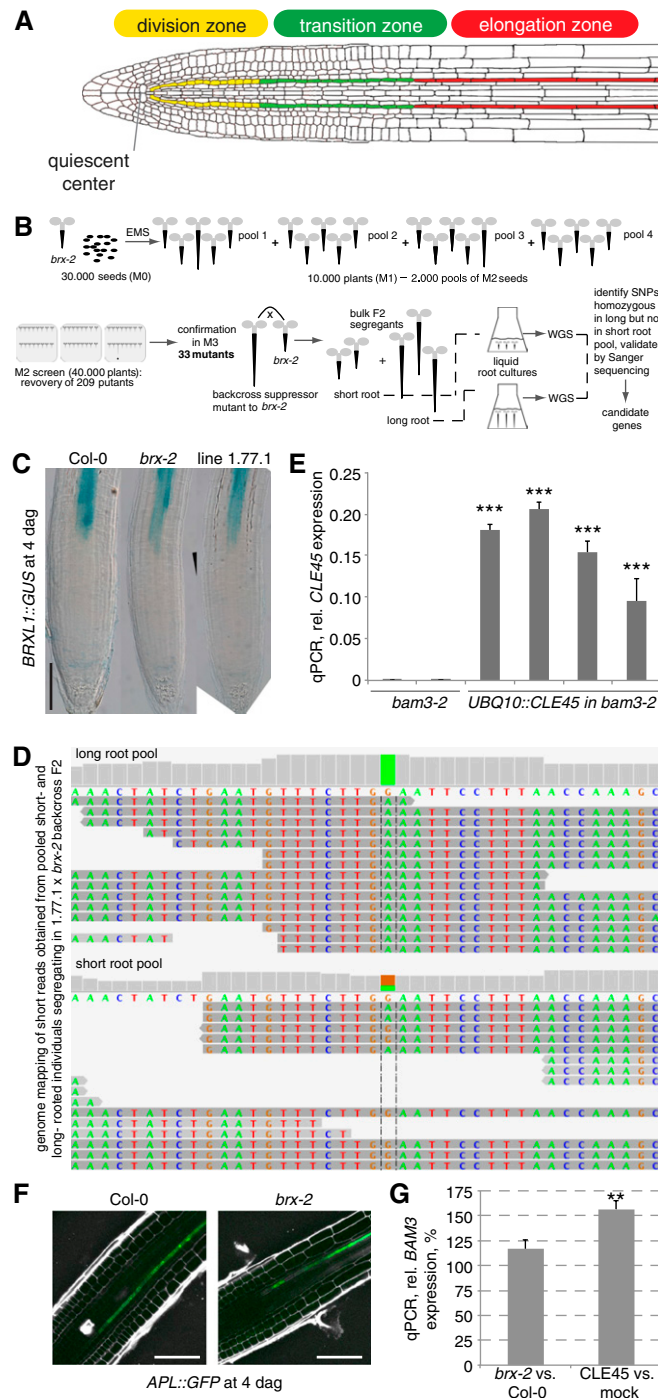

**Fig. S1.** (A) Overview of the *Arabidopsis* root meristem morphology, with the developing protophloem highlighted. (B) Schematic overview of the second site suppressor screen analysis. (C) Expression pattern of the *BREVIS RADIX-LIKE (BRXL1)* reporter gene in indicated backgrounds. (D) Read alignment highlighting the nonsynonymous SNP in the *BARELY ANY MERISTEM 3 (BAM3)* gene in line 1.77.1. (E) Relative expression of *CLAVATA3/ENDOSPERM SURROUNDING REGION (CLE45)* in the parental *bam3* mutant background and in independent transgenic lines carrying the *CLE45* overexpression construct. (F) Expression of the *ALTERED PHLOEM DEVELOPMENT (APL)::GFP* protophloem marker in WT and the *brx-2* mutant. (G) Relative expression level of *BAM3*; in *brx-2* compared with Columbia-0 (Col-0) (left column); in Col-0 treated for 3 h with 10 nM *CLE45* (right column) compared with mock-treated control. Error bars represent SEM; differences compared with background genotype are not significant unless indicated otherwise; \*\*\* $P < 0.001$ .

## Other Supporting Information Files

[Dataset S1 \(XLSX\)](#)

[Dataset S2 \(XLSX\)](#)
